# Supplementary material for: Copper(ii)-based coordination polymer nanofibers as a highly effective antibacterial material with a synergistic mechanism
Source: Royal Society of Chemistry journal article supplement (doi:10.1039/c9dt03649k), 2019-01-01
Supplement: c9dt03649k1.pdf [file c9dt03649k1.pdf]

**Supporting information for**

**Copper(II)-based coordination polymer nanofibers as highly  
effective antibacterial material with synergistic mechanism**

Abdul Rauf,<sup>a</sup> Junwei Ye,<sup>\*,a</sup> Siqi Zhang,<sup>a</sup> Ye Qi,<sup>a</sup> Guangyao Wang,<sup>a</sup> Ying Che<sup>\*,b</sup> Guiling  
Ning<sup>\*,a,c</sup>

<sup>a</sup> State Key Laboratory of Fine Chemicals, School of Chemical Engineering, Dalian University of  
Technology, 2 Linggong Road, Dalian 116024, P. R. China.

<sup>b</sup> Department of Ultrasound, the first Affiliated Hospital of Dalian Medical University, 193  
Lianhe Road, Dalian, Liaoning, 116011, PR China.

<sup>c</sup> Engineering Laboratory of Boric and Magnesium Functional Material Preparative and Applied  
Technology, Dalian, Liaoning Province, 116024, P. R. China.

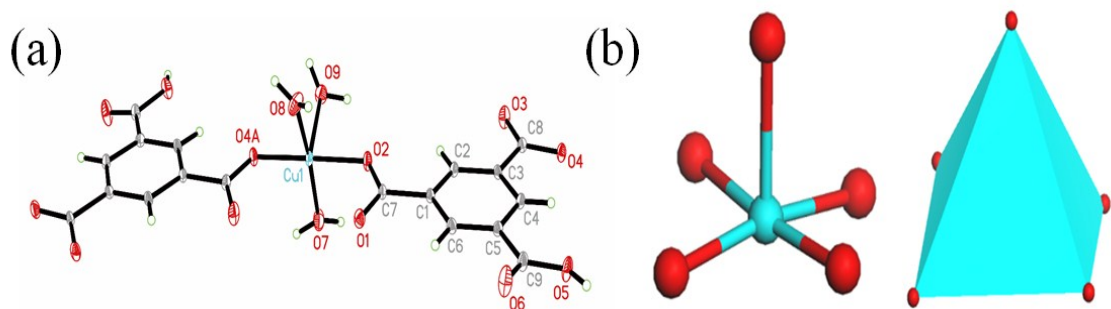

**Fig. S1** (a), (b) View of coordination environment of Cu<sup>2+</sup> centres in macro particle of  
[Cu(HBTC)(H<sub>2</sub>O)<sub>3</sub>]

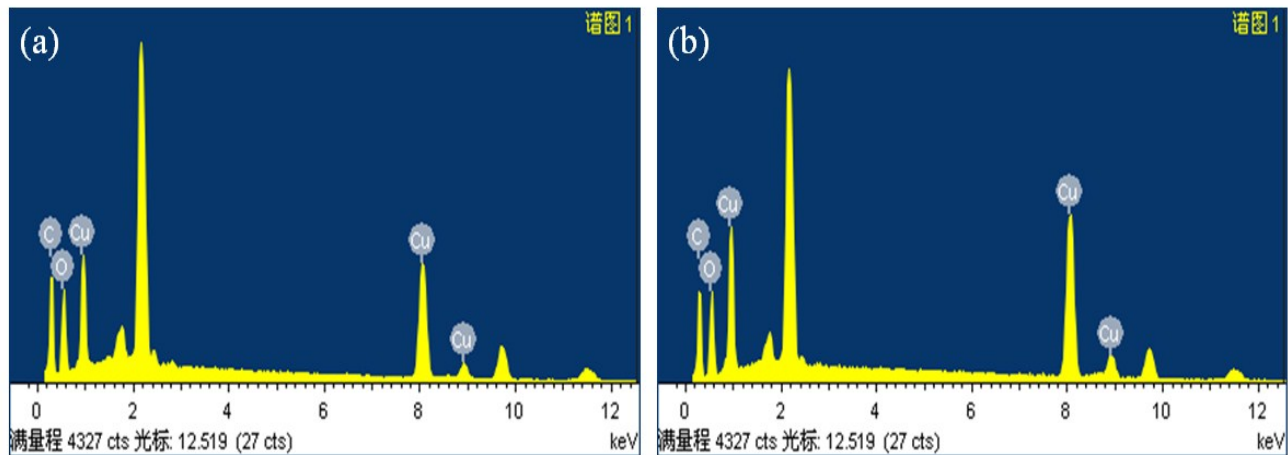

**Fig. S2** EDS spectra of (a) macroparticle, (b) nanofiber of  $[\text{Cu}(\text{HBTC})(\text{H}_2\text{O})_3]$

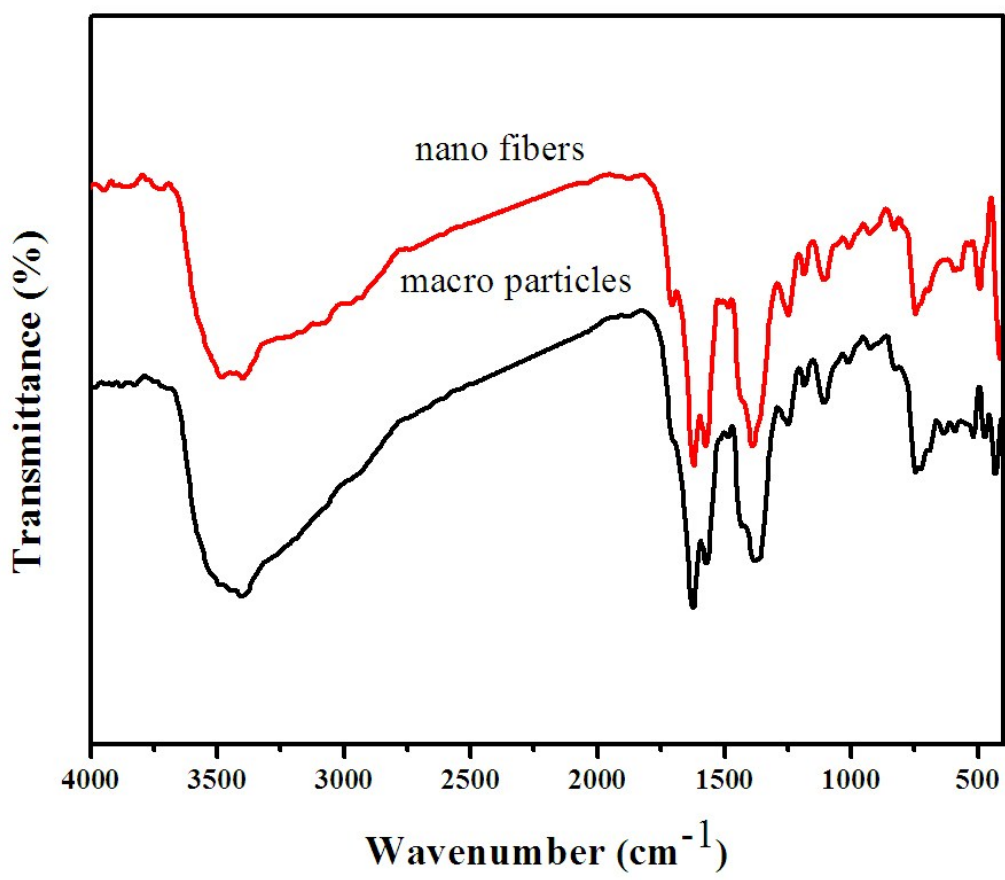

**Fig. S3** IR-Spectra of macro particles and nanofibers of  $[\text{Cu}(\text{HBTC})(\text{H}_2\text{O})_3]$

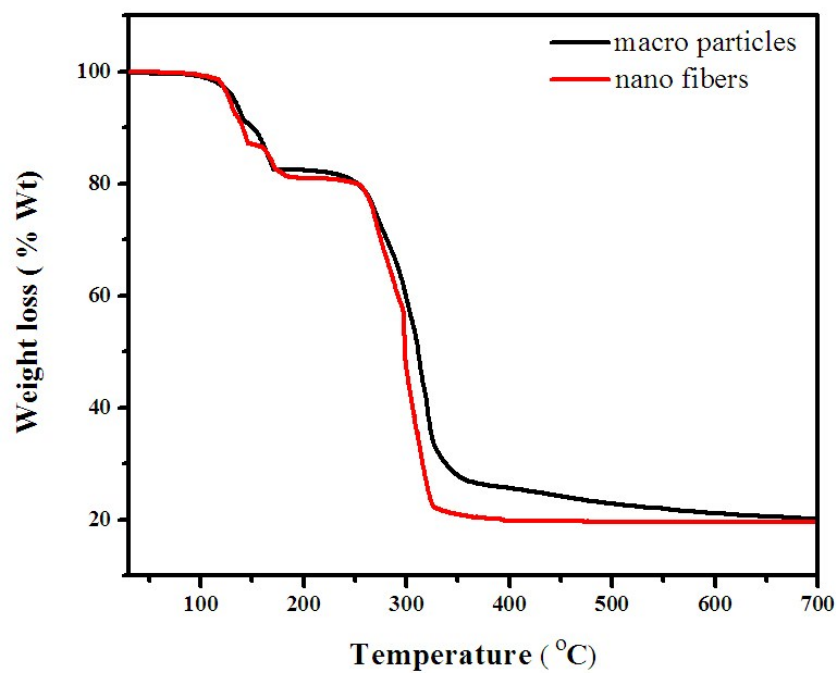

**Fig. S4** Thermo-gravimetric curve of macroparticles and nanofibers of  $[\text{Cu}(\text{HBTC})(\text{H}_2\text{O})_3]$

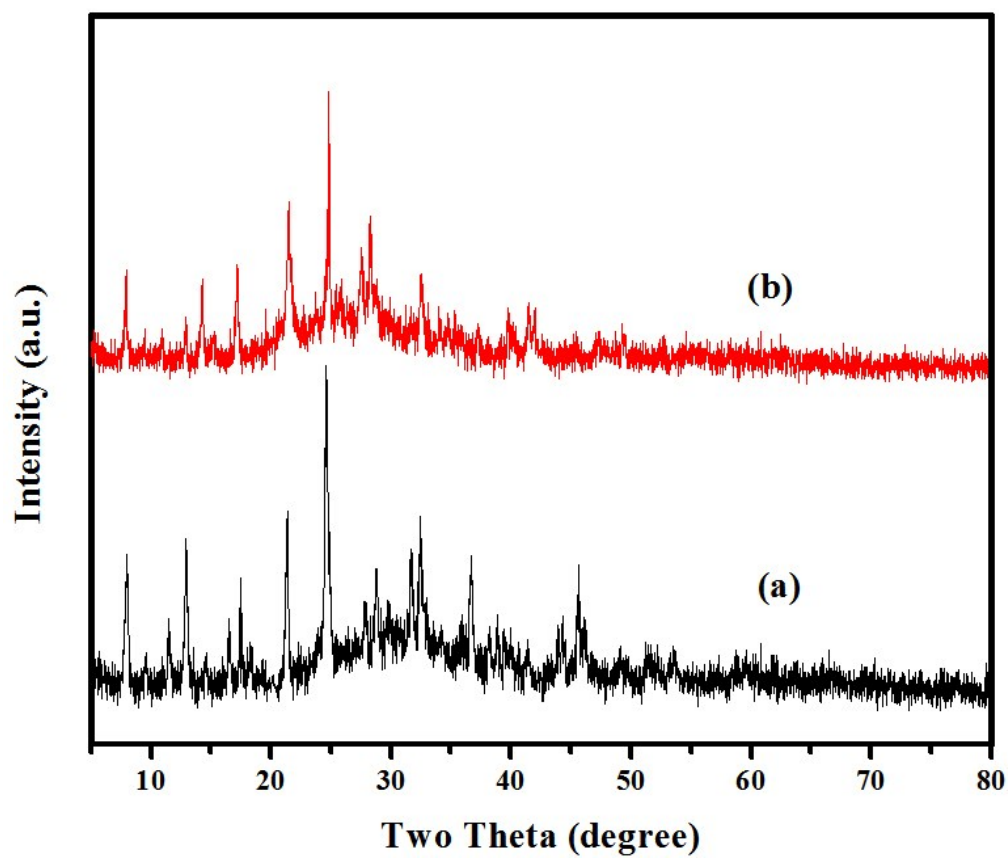

**Fig. S5** The XRD patterns of nanofibers before (a) and after (b) immersing into distilled water for 24 h.

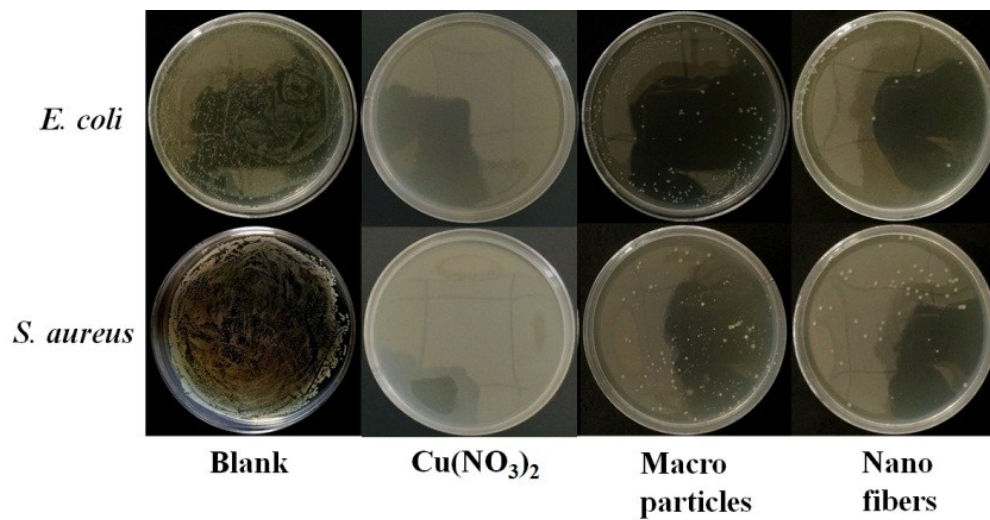

**Fig. S6** Colony count Percentage of inhibition *E. coli* (a) and *S. aureus* (b) after being treated with the Cu(NO<sub>3</sub>)<sub>2</sub>, macroparticles and nanofibers with 250 µg/mL concentration.

**Table S1** Crystal data and structure refinement for [Cu(HBTC)(H<sub>2</sub>O)<sub>3</sub>]

|                                                      |                                                 |
|------------------------------------------------------|-------------------------------------------------|
| Empirical formula                                    | C <sub>9</sub> H <sub>10</sub> CuO <sub>9</sub> |
| Formula weight                                       | 325.72                                          |
| Crystal system                                       | Monoclinic, P2 <sub>1</sub> /c                  |
| <i>T</i> (K)                                         | 296(2)                                          |
| <i>a</i> (Å)                                         | 6.8432(5)                                       |
| <i>b</i> (Å)                                         | 18.8678(13)                                     |
| <i>c</i> (Å)                                         | 10.6835(6)                                      |
| $\beta$ (°)                                          | 126.782(4)                                      |
| Volume (Å <sup>3</sup> )                             | 1104.80(13)                                     |
| <i>Z</i>                                             | 4                                               |
| <i>D</i> <sub>Calc</sub> (mg/m <sup>-3</sup> )       | 1.958                                           |
| $\mu$ (mm <sup>-1</sup> )                            | 2.021                                           |
| <i>F</i> <sub>(000)</sub>                            | 660                                             |
| <i>R</i> <sub>int</sub>                              | 0.0256                                          |
| GOF on <i>F</i> <sup>2</sup>                         | 1.017                                           |
| <i>R</i> <sub>1</sub> [ <i>I</i> > 2σ( <i>I</i> )]*  | 0.0372                                          |
| <i>wR</i> <sub>2</sub> [ <i>I</i> > 2σ( <i>I</i> )]* | 0.1020                                          |
| <i>R</i> <sub>1</sub> (all data) *                   | 0.0544                                          |
| <i>wR</i> <sub>2</sub> (all data)*                   | 0.1193                                          |

---

\* $R_1 = \frac{\sum ||F_o| - |F_c||}{\sum |F_o|}$ ;  $wR_2 = \{\frac{\sum [w(F_o^2 - F_c^2)^2]}{\sum [w(F_o^2)]^2}\}^{1/2}$

---



**Table S2.** Selected bond lengths [ $\text{\AA}$ ] and angles [ $^\circ$ ] for  $[\text{Cu}(\text{HBTC})(\text{H}_2\text{O})_3]$ 

|                               |            |                                |            |
|-------------------------------|------------|--------------------------------|------------|
| Cu(1)-O(2)                    | 1.9176(16) | Cu(1)-O(8)                     | 1.982(2)   |
| Cu(1)-O(4) <sup>#1</sup>      | 1.9289(16) | Cu(1)-O(9)                     | 2.2584(17) |
| Cu(1)-O(7)                    | 1.988(2)   | O(4) <sup>#1</sup> -Cu(1)-O(7) | 88.42(8)   |
| O(2)-Cu(1)-O(4) <sup>#1</sup> | 174.43(7)  | O(4) <sup>#1</sup> -Cu(1)-O(8) | 91.08(8)   |
| O(2)-Cu(1)-O(7)               | 87.30(8)   | O(7)-Cu(1)-O(9)                | 95.25(9)   |
| O(2)-Cu(1)-O(8)               | 93.79(8)   | O(8)-Cu(1)-O(7)                | 169.26(9)  |
| O(2)-Cu(1)-O(9)               | 90.28(7)   | O(8)-Cu(1)-O(9)                | 95.43(8)   |

Symmetry transformations used to generate equivalent atoms: #1 -x, y-1/2, -z+1/2.

**Table S3.** Hydrogen bonds for [Cu(HBTC)(H<sub>2</sub>O)<sub>3</sub>] [Å and °]

| D-H...A                         | d(D-H) | d(H...A) | d(D...A) | <(DHA) |
|---------------------------------|--------|----------|----------|--------|
| O(5)-H(5)···O(3) <sup>#1</sup>  | 0.83   | 1.76     | 2.569(2) | 164.0  |
| O(7)-H(7A)···O(5) <sup>#2</sup> | 0.88   | 2.01     | 2.867(3) | 166.2  |
| O(7)-H(7B)···O(1) <sup>#3</sup> | 0.86   | 1.85     | 2.685(3) | 161.6  |
| O(8)-H(8A)···O(4) <sup>#4</sup> | 0.87   | 2.29     | 3.123(3) | 160.2  |
| O(8)-H(8A)···O(9) <sup>#5</sup> | 0.87   | 2.63     | 3.092(3) | 114.4  |
| O(8)-H(8B)···O(1) <sup>#6</sup> | 0.87   | 1.86     | 2.707(3) | 164.6  |
| O(9)-H(9A)···O(3) <sup>#7</sup> | 0.87   | 2.40     | 3.067(3) | 133.5  |
| O(9)-H(9B)···O(6) <sup>#8</sup> | 0.89   | 1.91     | 2.795(3) | 169.4  |

Symmetry transformations used to generate equivalent atoms: #1 x+1,y,z+1; #2 -x+1,-y,-z+1; #3 x,-y-1/2,z-1/2 #4 -x,-y,-z+1; #5 x,-y-1/2,z+1/2; #6 x-1,-y-1/2,z-1/2; #7 -x-1,-y,-z; #8 x-1,y,z-1

**Table S4.** Results of the percentage of inhibition of bacterial growth by colony count method

(250 µg/mL)

| Materials         | Microorganism    | Percentage of inhibition of bacterial growth              |
|-------------------|------------------|-----------------------------------------------------------|
|                   |                  | $K = (N_{control} - N_{sample})/N_{control} \times 100\%$ |
| Commercial Cu-NPs | <i>E. coli</i>   | 24.0 %                                                    |
|                   | <i>S. aureus</i> | 24.3 %                                                    |
| Marcoparticles    | <i>E. coli</i>   | 96.7 %                                                    |
|                   | <i>S. aureus</i> | 96.2 %                                                    |
| Nanofibers        | <i>E. coli</i>   | 99.9 %                                                    |
|                   | <i>S. aureus</i> | 99.1 %                                                    |

*E. coli* = Escherichia coli; *S. aureus* = Staphylococcus aureus
